# Supplementary material for: The Effects of a Preconception Lifestyle Intervention on Childhood Cardiometabolic Health—Follow-Up of a Randomized Controlled Trial
Source: MDPI journal article supplement (doi:10.3390/cells11010041), 2021-12-24
Supplement: s1 [file s1]

## Supporting information

### “The effects of a preconception lifestyle intervention on childhood cardiometabolic health – follow-up of a RCT.”

Stijn Mintjens, Mireille N.M. van Poppel, Henk Groen, Annemieke Hoek, Ben Willem Mol, Rebecca C. Painter, Reinoud J.B.J. Gemke, Tessa J. Roseboom

**Corresponding author:**

Stijn Mintjens, MD

Department of Pediatrics

Department of Gynecology and Obstetrics

Emma Children's Hospital

Amsterdam Reproduction and Development research institute

Amsterdam UMC

Vrije Universiteit Amsterdam

De Boelelaan 1117 - Room 8D-14

1081 HZ Amsterdam

The Netherlands

s.mintjens@vumc.nl

Phone: +31 20 44 45238

**Table S1.** Cardiometabolic outcome values of boys and girls of mothers from the intervention and control group.

| Anthropometry                          |       |          |                     |          |                |                |
|----------------------------------------|-------|----------|---------------------|----------|----------------|----------------|
|                                        |       | <i>N</i> | <i>Intervention</i> | <i>N</i> | <i>Control</i> | <i>P-value</i> |
| BMI (Z-score) – mean (SD)              | Boys  | 6        | 0.94 (1.66)         | 16       | 0.53 (1.11)    | 0.51           |
|                                        | Girls | 10       | 0.55 (0.82)         | 12       | 0.75 (0.98)    | 0.61           |
| Waist circumference (cm) – mean (SD)   | Boys  | 6        | 55.1 (5.3)          | 16       | 53.4 (5.3)     | 0.50           |
|                                        | Girls | 11       | 52.5 (3.7)          | 13       | 53.4 (5.5)     | 0.65           |
| Hip circumference (cm) – mean (SD)     | Boys  | 6        | 59.2 (6.2)          | 16       | 58.1 (6.2)     | 0.73           |
|                                        | Girls | 11       | 57.9 (3.4)          | 13       | 58.9 (8.0)     | 0.70           |
| Body-fat (%)– mean (SD)                | Boys  | 5        | 19.9 (10.1)         | 14       | 20.2 (8.2)     | 0.95           |
|                                        | Girls | 11       | 21.0 (7.1)          | 12       | 22.3 (10.9)    | 0.75           |
| Cardiovascular                         |       |          |                     |          |                |                |
|                                        |       | <i>N</i> | <i>Intervention</i> | <i>N</i> | <i>Control</i> | <i>P-value</i> |
| SBP (Z-score) – mean (SD)              | Boys  | 5        | 1.00 (0.54)         | 16       | 0.45 (0.58)    | 0.08           |
|                                        | Girls | 11       | 0.21 (0.55)         | 11       | 0.68 (0.54)    | 0.06           |
| DBP (Z-score) – mean (SD)              | Boys  | 5        | 1.21 (0.77)         | 16       | 0.92 (0.61)    | 0.40           |
|                                        | Girls | 11       | 0.78 (0.60)         | 11       | 1.03 (0.52)    | 0.31           |
| PWV (m/sec) – mean (SD)                | Boys  | 3        | 4.69 (1.48)         | 12       | 4.70 (1.04)    | 0.99           |
|                                        | Girls | 9        | 4.45 (0.62)         | 10       | 4.28 (1.27)    | 0.70           |
| Metabolic                              |       |          |                     |          |                |                |
|                                        |       | <i>N</i> | <i>Intervention</i> | <i>N</i> | <i>Control</i> | <i>P-value</i> |
| Triglycerides (mmol/L) – mean (SD)     | Boys  | 3        | 0.46 (0.13)         | 11       | 0.51 (0.19)    | 0.74           |
|                                        | Girls | 4        | 0.90 (0.81)         | 6        | 0.56 (0.13)    | 0.47           |
| Total cholesterol (mmol/L) – mean (SD) | Boys  | 3        | 3.69 (0.56)         | 11       | 4.04 (0.62)    | 0.39           |
|                                        | Girls | 4        | 4.69 (0.69)         | 6        | 4.12 (0.41)    | 0.13           |
| LDL cholesterol (mmol/L) – mean (SD)   | Boys  | 3        | 1.88 (0.41)         | 11       | 2.30 (0.41)    | 0.15           |
|                                        | Girls | 4        | 2.89 (0.40)         | 6        | 2.47 (0.39)    | 0.14           |
| HDL cholesterol (mmol/L) – mean (SD)   | Boys  | 3        | 1.59 (0.19)         | 11       | 1.52 (0.29)    | 0.68           |
|                                        | Girls | 4        | 1.40 (0.19)         | 6        | 1.40 (0.17)    | 0.96           |
| Insulin (μIU/ml) – mean (SD)           | Boys  | 3        | 4.56 (1.87)         | 7        | 4.45 (3.22)    | 0.96           |
|                                        | Girls | 4        | 6.25 (3.94)         | 6        | 3.87 (2.63)    | 0.31           |
| Glucose (mmol/L) – mean (SD)           | Boys  | 3        | 4.73 (0.12)         | 11       | 4.61 (0.35)    | 0.56           |
|                                        | Girls | 4        | 4.68 (0.45)         | 6        | 4.20 (0.43)    | 0.13           |
| HOMA-IR – mean (SD)                    | Boys  | 3        | 0.96 (0.41)         | 7        | 0.95 (0.71)    | 0.98           |
|                                        | Girls | 4        | 1.36 (0.97)         | 5        | 0.76 (0.57)    | 0.29           |

BMI = Body mass index, SBP = Systolic blood pressure, DBP = Diastolic blood pressure, PWV = Pulse wave velocity, LDL = Low density lipoprotein, HDL = High density lipoprotein, HOMA-IR = Homeostatic model of insulin resistance.

**Table S2: Cardiometabolic outcome values of children of mothers who successfully\* lost weight compared to children of mothers who did not successfully lose weight, pooled data independent of the randomization group.**

| <b>Anthropometry</b>                        |          |                   |          |                     |                |
|---------------------------------------------|----------|-------------------|----------|---------------------|----------------|
|                                             | <i>N</i> | <i>Successful</i> | <i>N</i> | <i>Unsuccessful</i> | <i>P-value</i> |
| <b>BMI (Z-score) – mean (SD)</b>            | 8        | 0.52 (0.73)       | 36       | 0.68 (1.15)         | 0.72           |
| <b>Waist circumference (cm) – mean (SD)</b> | 8        | 53.2 (5.3)        | 38       | 53.4 (5.3)          | 0.93           |
| <b>Hip circumference (cm) – mean (SD)</b>   | 8        | 58.7 (6.5)        | 38       | 58.3 (6.5)          | 0.88           |
| <b>Body-fat (%)– mean (SD)</b>              | 8        | 20.8 (6.4)        | 34       | 21.0 (9.3)          | 0.94           |
| <b>Cardiovascular</b>                       |          |                   |          |                     |                |
|                                             | <i>N</i> | <i>Successful</i> | <i>N</i> | <i>Unsuccessful</i> | <i>P-value</i> |
| <b>SBP (Z-score) – mean (SD)</b>            | 8        | 0.24 (0.68)       | 35       | 0.57 (0.57)         | 0.16           |
| <b>DBP (Z-score) – mean (SD)</b>            | 8        | 0.98 (0.70)       | 35       | 0.93 (0.58)         | 0.84           |
| <b>PWV (m/sec) – mean (SD)</b>              | 6        | 4.86 (0.76)       | 28       | 4.43 (1.08)         | 0.36           |

BMI = Body mass index, SBP = Systolic blood pressure, DBP = Diastolic blood pressure, PWV = Pulse wave velocity.

\* Successful was defined as: women who lost >5% of their original body weight or achieved a BMI <29 kg/m<sup>2</sup> during the 24 months LIFEstyle study period, independent of assigned group at randomization.
